# Supplementary material
Source: publisher site journal article supplement (https://www.dovepress.com/get_supplementary_file.php?f=387809.docx)
Supplement: Supplementary file 1 [file get_supplementary_file.php]

Supplementary Table 1 Variables associated with RMPP among MUMPP children continuing to receive macrolide after the confirmation of MUMPP in univariate logistic regression analysis

| Variable | OR (95% CI) | P value |
| --- | --- | --- |
| Age | 1.174 (1.078~1.287) | 0 |
| Sex | 1.062 (0.553~2.053) | 0.856 |
| Weight | 1.019 (0.987~1.051) | 0.242 |
| Leukocyte count | 1.202 (1.117~1.309) | 0 |
| Neutrophil proportion | 1.133 (1.066~1.219) | 0 |
| Platelets count | 1.006 (1.000~1.012) | 0.064 |
| C-reactive protein | 1.087 (1.030~1.151) | 0.003 |
| Albumin ≥30 g/L | 0.647 (0.330~1.247) | 0.197 |
| Erythrocyte sedimentation rate | 1.024 (1.001~1.048) | 0.046 |
| Serum procalcitonin | 11.835 (4.841~33.463) | 0 |
| Lactate dehydrogenase | 1.004 (1.003~1.006) | 0 |
| Coinfection with other respiratory pathogens | 3.191 (0.588~10.015) | 0.057 |

OR, odds ratio.
